# Supplementary material for: Acetyl-CoA Carboxylase Inhibitor CP640.186 Increases Tubulin Acetylation and Impairs Thrombin-Induced Platelet Aggregation
Source: MDPI journal article supplement (doi:10.3390/ijms222313129), 2021-12-04
Supplement: s1 [file s1]

**Figure S1**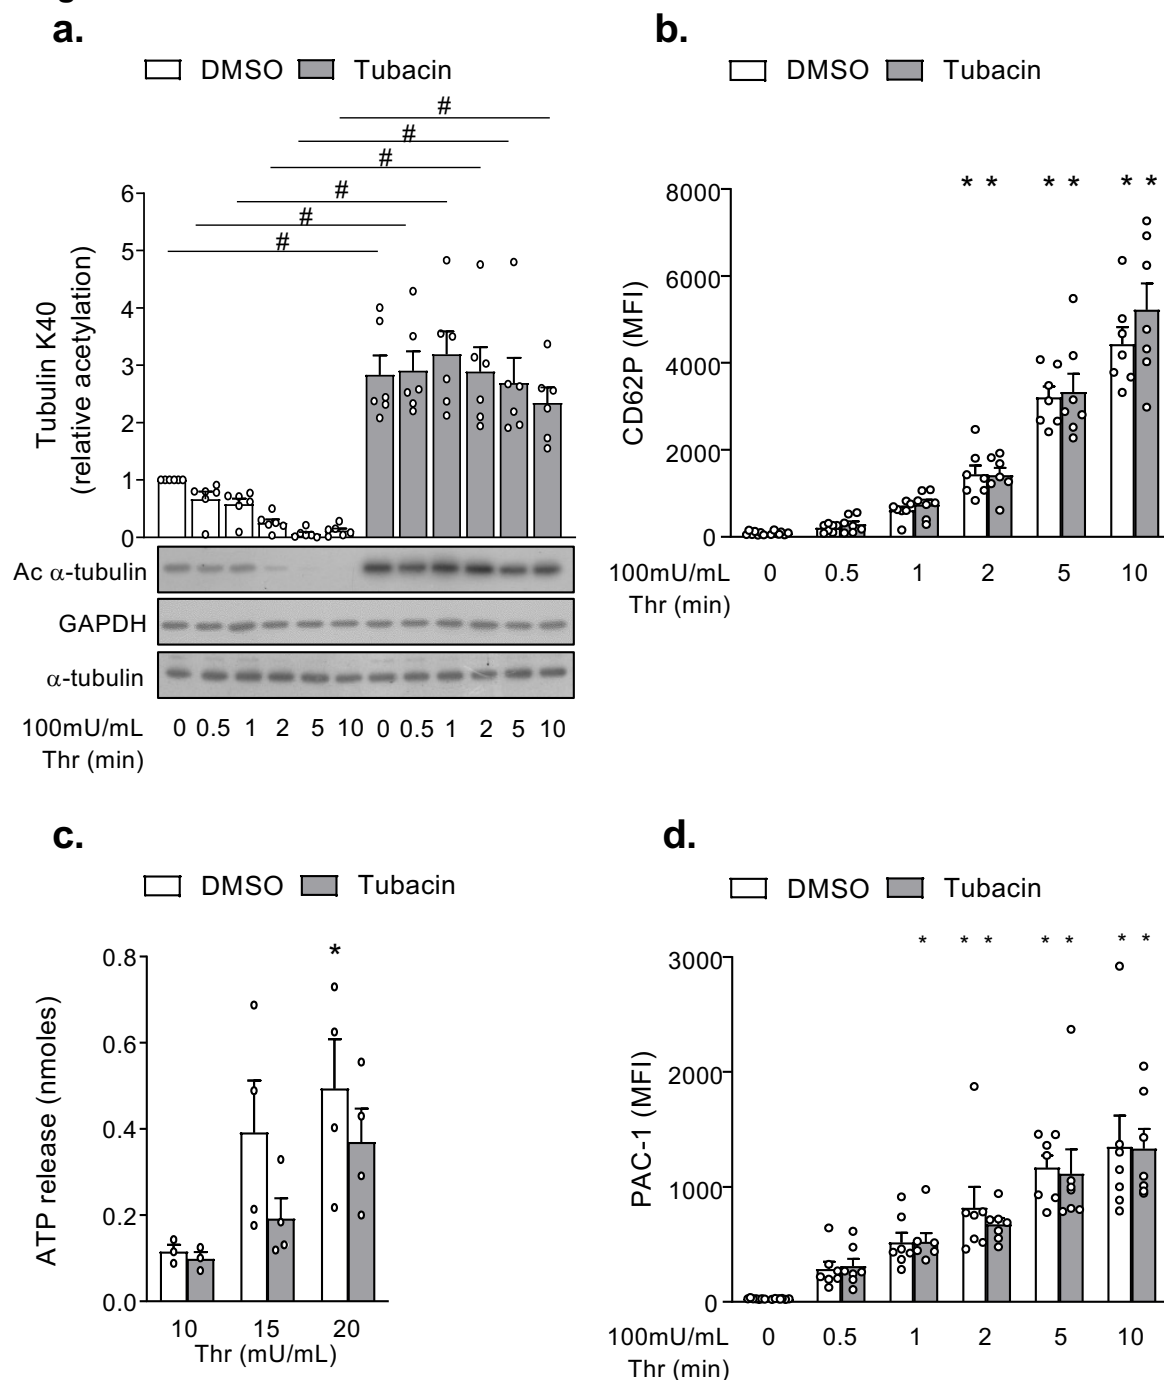

**Figure S1. HDAC6 inhibition induced by tubacin increases  $\alpha$ -tubulin acetylation level with no impact on granules secretion or  $\alpha$ IIB $\beta$ 3 activation upon thrombin stimulation.**

(a-e) Washed human platelets were preincubated for 1 hour with DMSO or tubacin (10  $\mu$ M) before being stimulated with thrombin (Thr). (a) Platelets were stimulated with 100mU/mL Thr at different time points. Whole platelet lysates were subjected to western blot and probed with acetyl  $\alpha$ -tubulin (Ac  $\alpha$ -tubulin),  $\alpha$ -tubulin or gelsolin antibodies. Data are expressed as means  $\pm$  SEM (n = 6). # p-value  $\leq$  0.0001 relative to DMSO condition. Data were compared using 2-way ANOVA. (b) P-selectin (CD62P) exposure was analyzed by flow cytometry in platelets stimulated with 100mU/mL Thr at different time points. Data are expressed as means  $\pm$  SEM (n = 7). \* p-value  $\leq$  0.05 relative to unstimulated condition. Data underwent 2-way ANOVA. (d) Dense granules secretion was assessed via addition of luciferase-luciferin reagent in platelets stimulated with different Thr concentrations. Data are expressed as means  $\pm$  SEM (n = 4). Data were compared using 2-way ANOVA. (e) Platelets were stimulated with 100mU/mL thrombin (Thr) at different time points and  $\alpha$ IIB $\beta$ 3 activation (PAC-1) was detected by flow cytometry. Data are expressed as mean  $\pm$  SEM (n = 7). \* p-value  $\leq$  0.05 relative to unstimulated condition. Data were compared using 2-way ANOVA.

**Figure S2**

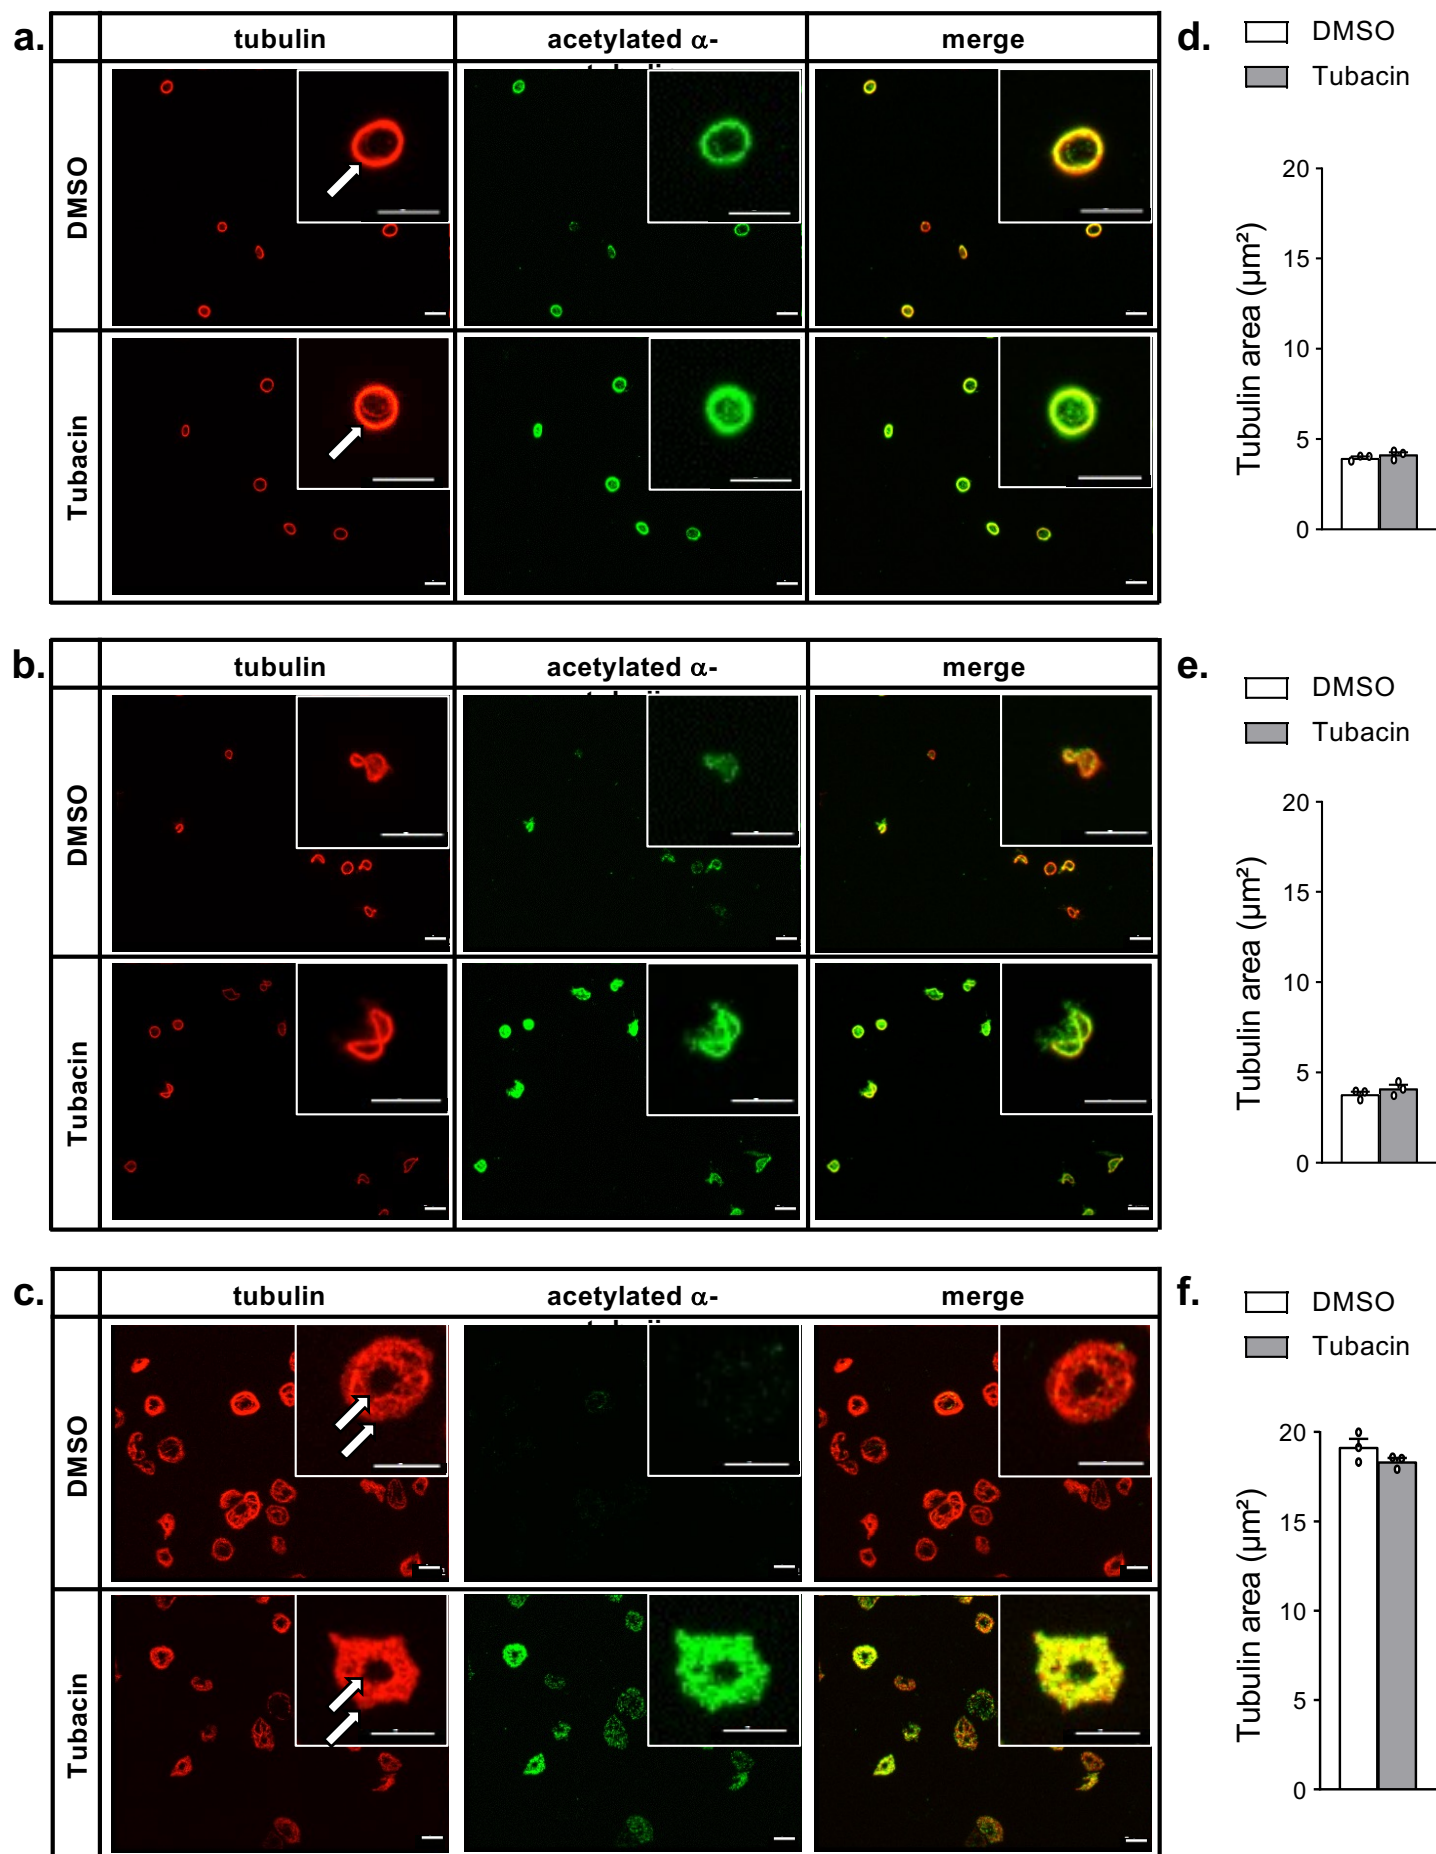

**Figure S2. HDAC6 inhibition induced by tubacin does not affect microtubules organization.**

(a-f) Washed human platelets were preincubated for 1 hour with DMSO or tubacin (10 $\mu\text{M}$ ) before being added to fibrinogen-coated coverslips for 10 min. (a) Unstimulated platelets were fixed directly with 1% PFA and then added to coverslips. (b) Platelets were added to coverslips before being fixed with 1% PFA. (c) Platelets were stimulated with 100mU/mL thrombin and then added to coverslips before being fixed with 1% PFA. (a-c) Platelets were stained with tubulin (red) or acetyl  $\alpha$ -tubulin (green) antibodies. Representative pictures are shown. Microtubule rings are indicated by white arrows. Scale bar, 5  $\mu\text{m}$ . (d-f) Quantification of tubulin area. Data are expressed as means  $\pm$  SEM (n = 3). Data were compared using unpaired t-test.

Figure S3

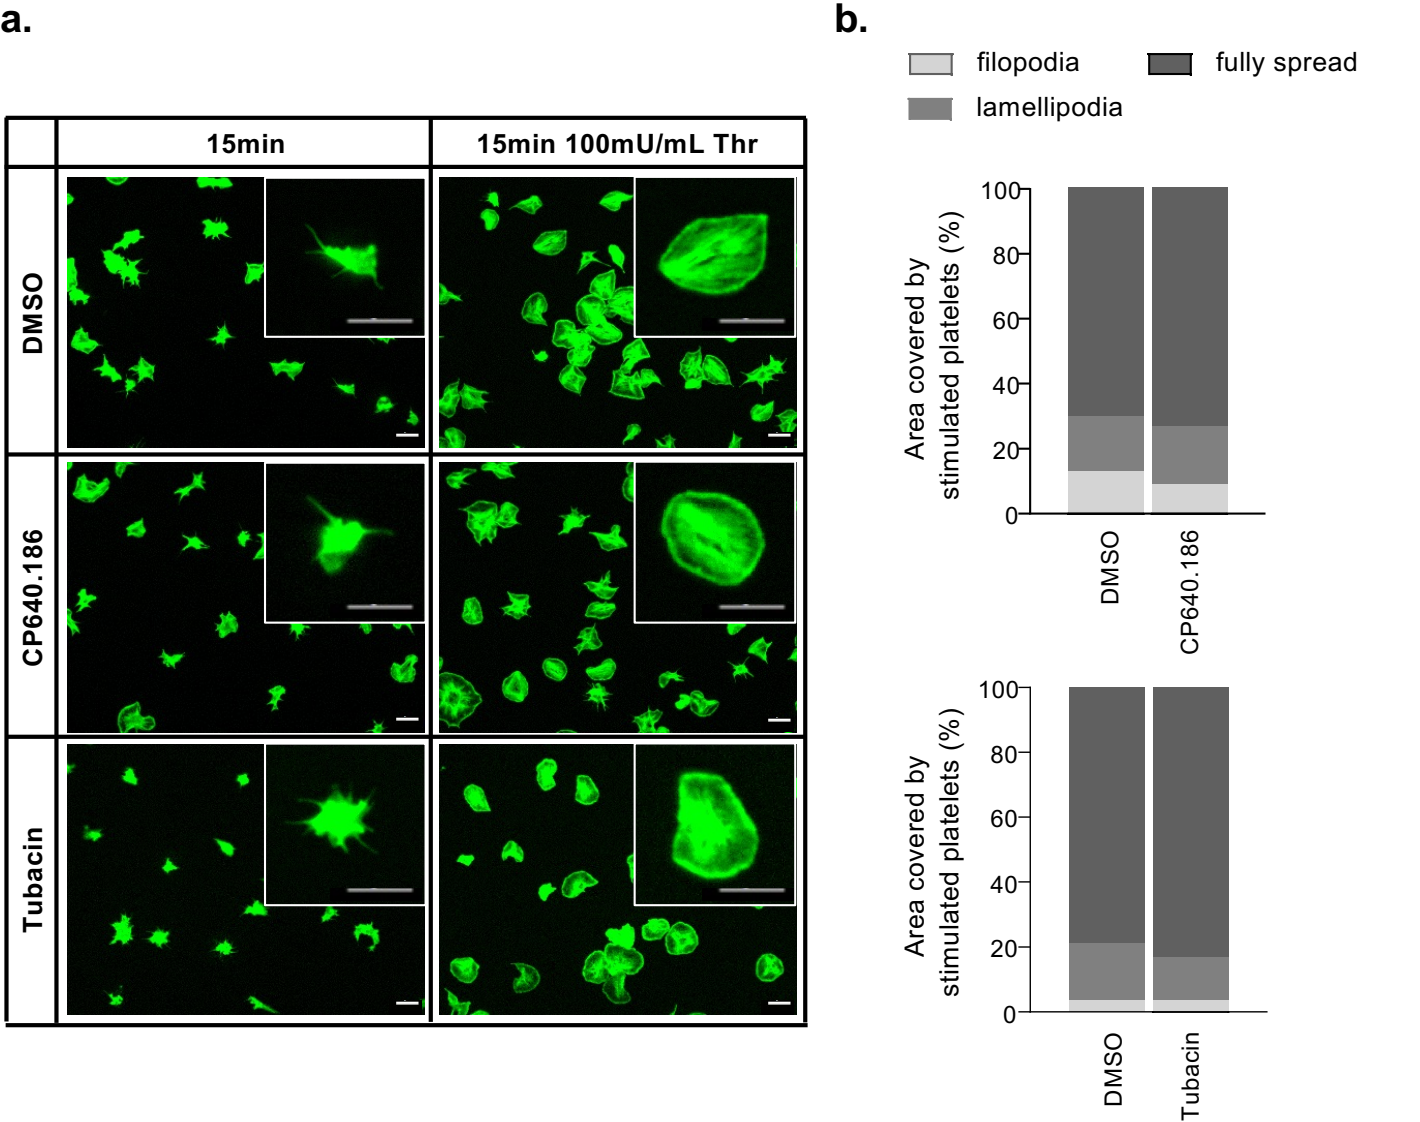

**Figure S3. ACC or HDAC6 inhibition does not impact actin cytoskeleton remodeling.**  
(a-b) Washed human platelets were preincubated for 2 h with DMSO or CP640.186 (60  $\mu$ M) or 1 h with tubacin (10 $\mu$ M) (a; left panel) without thrombin (Thr) or (a; right panel) after Thr stimulation (100mU/mL) for 15 minutes. Platelets were stained with phalloidin-FITC for 45 min. (a) Representative pictures are shown. Scale bar, 5  $\mu$ m. (b) Quantification of area covered by stimulated platelets expressing filopodia, lamellipodia or being fully spread. Data underwent 2-way ANOVA.

Figure S4

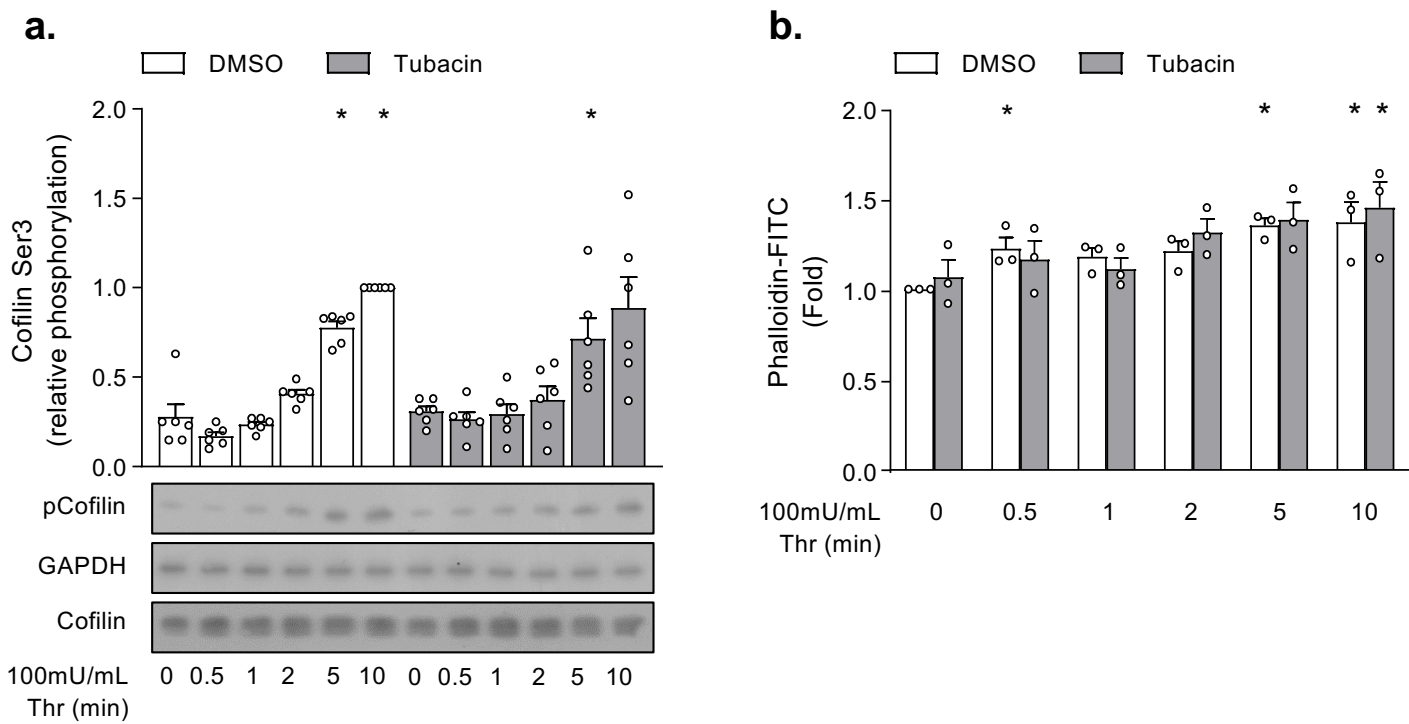

**Figure S4. HDAC6 inhibition induced by tubacin reduces the activation of Rac1-PAK2 pathway in response to thrombin but does not affect actin polymerization.**

(a-d) Washed human platelets were preincubated for 1 hour with DMSO or tubacin (10μM) before being stimulated with thrombin (Thr) (100mU/mL) at different time points. (a) Whole platelet lysates were subjected to western blot and probed with phosphoCofilin, Cofilin or GAPDH antibodies. Data are expressed as means ± SEM (n = 6). \* p-value ≤ 0.05 relative to unstimulated condition. Data were analyzed using 2-way ANOVA. (b) Platelets were stained with FITC-conjugated phalloidin (10μM) for 1 hour. F-actin content was analyzed by flow cytometry. Data are expressed as means ± SEM (n = 3). \* p-value ≤ 0.05 relative to unstimulated condition. Data were analyzed using 2-way ANOVA.

Figure S5

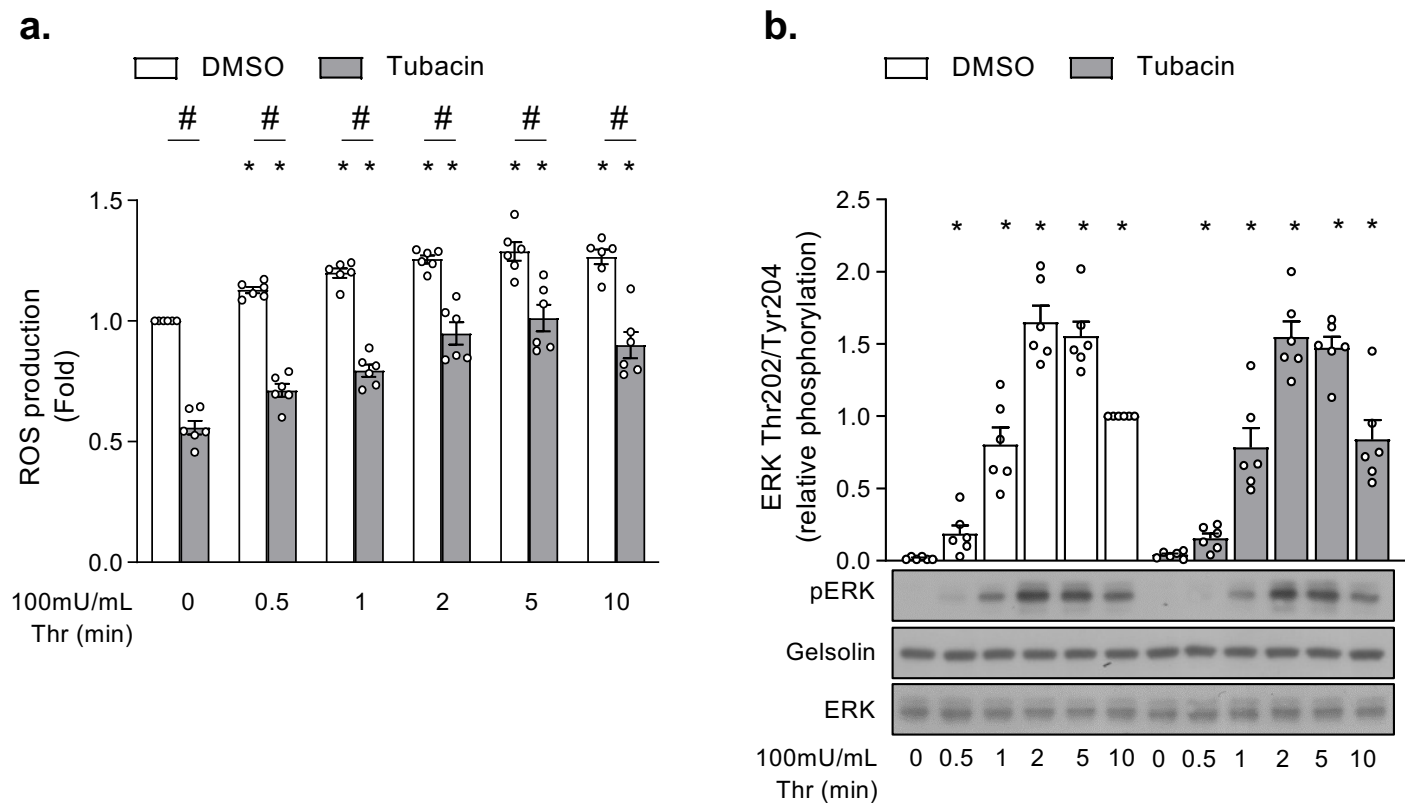

**Figure S5. HDAC6 inhibition induced by tubacin decreases thrombin-induced reactive oxygen species (ROS) production but does not impact ERK phosphorylation.**

(a-b) Washed human platelets were preincubated for 1 h with DMSO or tubacin (10μM) before being stimulated or not with thrombin (100mU/mL) at different time points. (a) Reactive oxygen species (ROS) were detected by flow cytometry using H<sub>2</sub>DCFDA (10μM) probe. Data are expressed as means ± SEM (n = 6). \* p-value ≤ 0.05 relative to unstimulated condition. # p-value ≤ 0.05 relative to DMSO condition. Data underwent 2-way ANOVA. (b) Whole platelet lysates were subjected to western blot and probed with phosphoERK, ERK or gelsolin antibodies. Data are expressed as means ± SEM (n = 6). \* p-value ≤ 0.05 relative to unstimulated condition. Data underwent 2-way ANOVA..
